# Supplementary material
Source: publisher site journal article supplement (https://www.dovepress.com/article/386286)
Supplement: Supplementary file 1 [file get_supplementary_file.php]

**Appendix A:** Objectives and goals of the Online Graduate Medical Education (GME) lectures.

| ***Lecture Title (Length in minutes)*** | ***Goals and Objectives*** |
| --- | --- |
| Crew Resource Management (60 minutes) | - To discuss the origin of crew resource management and its value in healthcare. - To discuss a toolkit of behaviors, skills, and tools for building a robust safety culture in medicine. - To describe standardized scripts to invite and communicate questions and concerns about crew resource management. - To illustrate why all team members are integral to the patient safety system. |
|  |  |
| Joint (Team) Rounding and Paging Etiquette (20 minutes) | - To describe joint rounding and points of emphasis. - To illustrate joint rounding using a videotaped simulation of multidisciplinary rounding with a debriefing on areas to improve. - To discuss paging and EPIC secure chat etiquette overview with examples. |
|  |  |
| Point-of-care ultrasound (15 minutes) | - To describe the basics and principles of ultrasound image generation. - To discuss the basics of orientating an ultrasound probe and image acquisition. - To discuss how to interpret ultrasound findings to influence clinical decision-making. |
|  |  |
| Restraints (15 minutes) | - To discuss when you should consider ordering restraints and the indications. - To evaluate the types of restraints and some restraint alternatives. - To analyze the steps required to order restraints. |
|  |  |
| Effective handoffs (20 minutes) | - To define standardized multidisciplinary bedside handoff. - To summarize the importance of a detailed handoff. - To describe the process of a handoff and team member notes. - To share feedback from team members about the handoff process. |
|  |  |
| Misadventures in line and tube placement (30 minutes) | - To discuss common complications of lines and tube placement. - To review common radiologic findings associated with catheter and tube insertion complications. |
|  |  |
| Epidemiology (40 minutes) | - To outline the resources available for epidemiology. - To discuss the indications and resources for personal protective equipment (PPE) and isolation. - Discuss how to order different types of PPE and patient isolation. - To analyze COVID-19 safety and requirements. |
|  |  |
| Patient Safety (20 minutes) | - To describe hands-on orientation to patient safety and identify potential patient safety issues. - To illustrate patient safety and its reporting using a videotaped simulation. |
|  |  |
| Quality Improvement (30 minutes) | - To develop proficiency with DMAIC process improvement methodology to define and measure potential opportunities for meaningful healthcare improvement. - To discuss the use of quality improvement to deliver safe, effective, equitable, high-value care. - To advance knowledge of quality improvement methodology and process improvement. - To illustrate how to identify quality improvement projects and get involved in existing projects at the medical center or within your department. - To increase understanding of and ability to address healthcare disparities using quality improvement initiatives. |
|  |  |
| Medical Information Management (30 minutes) | - To discuss the requirements for documentation and billing in a patient’s medical health record. - To describe the documenting of procedures in a patient’s medical record. - To review HIPAA and the importance of protecting sensitive patient health information - Discuss how to report complications and the integrity of documentation. |
|  |  |
| LeadServeInspire (15 minutes) | - Discuss the LeadServeInspire curriculum and its benefits to medical education and teaching. |
|  |  |
| Patient with Limited English Proficiency (20 minutes) | - Understand and develop skills to appropriately interact with patients with limited English proficiency. - To illustrate how to interact with a patient with limited English proficiency using a videotaped simulation |
|  |  |
| Learning Environment and Student Mistreatment (35 minutes) | - To discuss how to create an ideal learning environment. - To describe the types of mistreatment and identify when they occur. - To review trends of mistreatment in graduate medical education at The Ohio State University - To analyze how to safely and adequately report mistreatment. - To describe clinical examples of mistreatment. |
|  |  |
| Professionalism (30 minutes) | - To discuss the importance of professionalism. - To describe ways to handle varying situations professionally. |
|  |  |
| Empathetic communication (30 minutes) | - Define empathy and understand its meaning. - Outline empathetic communication strategies. - To discuss communication strategies. |
|  |  |
| Ombuds and Coaching Program (20 minutes) | - To discuss ombuds and their role. - To describe the role of the coach. - Present a toolkit for using these resources and working with the ombuds/coach. |
|  |  |
| GME Policies (20 minutes) | - To review examples of common policies for residents regarding training and vacation. |
|  |  |
| Human Resources and Benefits (30 minutes) | - To discuss resident benefits and personalization of benefits for each resident. - To discuss the role of human resources in residency training and how to contact them. |

**Appendix B –** Survey Questions and Response options.

| **Question (Response)** |
| --- |
| ***How frequently will you use the content from this orientation to perform your duties at OSUWMC?***  Frequently  Occasionally  Sometimes  Rarely |
| ***How would you rate the overall quality of your graduate medical education orientation?***  Very good  Good  Acceptable  Poor  Very poor |
| ***How effective or ineffective was this virtual orientation for your learning?***  Very effective  Effective  Somewhat effective  Somewhat ineffective  Ineffective  Very ineffective |
| ***The Carmen course was easy to access.***  Strongly agree  Agree  Neutral  Disagree  Strongly disagree |
| ***The Carmen course was easy to navigate.***  Strongly agree  Agree  Neutral  Disagree  Strongly disagree |
| ***The orientation was well organized.***  Strongly agree  Agree  Neutral  Disagree  Strongly disagree |
| ***The modules supported my learning***  Strongly agree  Agree  Neutral  Disagree  Strongly disagree |
